# Supplementary material for: Disease burden due to biomass cooking-fuel-related household air pollution among women in India
Source: PubMed Central journal article supplement (PMC4221659; doi:10.3402/gha.v7.25326), 2014-11-04

**Supplementary table 1.** Meta-analysis for the association between biomass cooking fuel exposure and disease outcomes

| Author                    | Study design                      | Location                         | Eligibility criteria                                         | Exposure fuel          | Comparison fuel                                                                                | Sample size of women    | Outcome                                                                      | Reported OR (95% CI) | Variables adjusted                                                                                | Pooled OR         | I square, p value* |
|---------------------------|-----------------------------------|----------------------------------|--------------------------------------------------------------|------------------------|------------------------------------------------------------------------------------------------|-------------------------|------------------------------------------------------------------------------|----------------------|---------------------------------------------------------------------------------------------------|-------------------|--------------------|
| <b>Chronic bronchitis</b> |                                   |                                  |                                                              |                        |                                                                                                |                         |                                                                              |                      |                                                                                                   |                   |                    |
| Johnson P et al. (4)      | Cross-sectional                   | Rural community based Tiruvallur | Non-smoking women, aged ≥30                                  | Wood                   | LPG, electricity                                                                               | 900                     | COPD based on clinical examination, spirometry                               | 1.43 (0.36, 5.73)    | House type, kitchen type, passive smoking, cooking duration etc.,                                 |                   |                    |
| Sukhsohal ND et al. (27)  | Cross-sectional                   | Rural community based Nagpur     | Non-smoking non-pregnant women involved in cooking, aged ≥15 | Biomass                | LPG                                                                                            | 760                     | PEFR less than 80% of the predicted was classified as abnormal lung function | 2.49 (1.64, 3.77)    | None                                                                                              | 2.37 (1.59, 3.54) | 0.0, 0.45          |
| <b>Tuberculosis</b>       |                                   |                                  |                                                              |                        |                                                                                                |                         |                                                                              |                      |                                                                                                   |                   |                    |
| Mishra VK et al. (9)      | Secondary data analysis of NFHS-1 | Country level, India             | Women aged ≥20                                               | Biomass (wood or dung) | Cleaner fuels (charcoal, coal, coke, lignite, kerosene, electricity, petroleum gas, or biogas) | 1,23,824                | Self-reported TB                                                             | 2.74 (1.86, 4.05)    | Separate kitchen, house type crowding, age, residence, education etc.,                            |                   |                    |
| Behera D et al. (6)       | Case-control                      | Hospital based, Delhi            | Non-smoking women                                            | Biomass                | LPG                                                                                            | 109 cases, 95 controls  | Sputum positive TB                                                           | 0.60 (0.20, 1.60)    | Socio economic status, smoking in family, ventilation, exposure index, respiratory symptoms etc., |                   |                    |
| Lakshmi PVM et al. (7)    | Case-control                      | Urban slums and rural areas,     | Women aged 20 to 64 years without co-                        | Biomass                | LPG                                                                                            | 126 cases, 252 controls | Sputum positive TB                                                           | 3.14 (1.15, 8.56)    | Education, overcrowding, kitchen type, TB                                                         | 2.33 (1.65, 3.28) | 75.1, 0.01         |

|                         |                                   |                                   |                                                                 |                                         |                                                       |                         |                                                                                                          |                   |                                                                                                                         |                   |           |
|-------------------------|-----------------------------------|-----------------------------------|-----------------------------------------------------------------|-----------------------------------------|-------------------------------------------------------|-------------------------|----------------------------------------------------------------------------------------------------------|-------------------|-------------------------------------------------------------------------------------------------------------------------|-------------------|-----------|
|                         |                                   | Chandigarh                        | morbid conditions                                               |                                         |                                                       |                         |                                                                                                          |                   | history, smoker in family etc.,                                                                                         |                   |           |
| <b>Cataract</b>         |                                   |                                   |                                                                 |                                         |                                                       |                         |                                                                                                          |                   |                                                                                                                         |                   |           |
| Zodpey SP et al. (10)   | Case-control                      | Hospital based, Nagpur            | Women aged 35 to 75                                             | Biomass (cow dung, wood)                | LPG                                                   | 223 cases, 223 controls | Lens opacity with visual acuity 6/60 or worse in affected eye, age related cataract without other causes | 2.37 (1.44, 4.13) | Age, socio-economic status                                                                                              |                   |           |
| Pokhrel AK et al. (11)  | Case-control                      | Hospital based, Indo-Nepal border | Women aged 35 to 75                                             | Solid-fuel-burning stoves without flues | Kerosene, LPG, biogas, or electricity                 | 206 cases, 203 controls | Ophthalmologist confirmed cataract cases without other causes                                            | 1.90 (1.00, 3.61) | Kitchen ventilation, working outdoors, literacy, residence, source of light, incense burning                            | 2.16 (1.42, 3.26) | 0.0, 0.60 |
| <b>Stillbirth</b>       |                                   |                                   |                                                                 |                                         |                                                       |                         |                                                                                                          |                   |                                                                                                                         |                   |           |
| Mishra V et al. (14)    | Secondary data analysis of NFHS-2 | Country level, India              | Ever-married women, aged 40 to 49 with complete birth histories | Biomass (wood, dung, or crop residues)  | Cleaner fuels (electricity, LPG, biogas, or kerosene) | 19,189                  | Delivery of a dead baby after the 28th week of pregnancy                                                 | 1.44 (1.04, 1.97) | Tobacco smoke, woman's nutritional status, socioeconomic status, household conditions, residence etc.,                  |                   |           |
| Lakshmi PVM et al. (13) | Secondary data analysis of DLHS-2 | Country level, India              | Currently married aged 15 to 44                                 | Wood                                    | LPG, electricity                                      | 1,88,917                | Delivery of a dead baby after the 28th week of pregnancy                                                 | 1.24 (1.08, 3.27) | Literacy, lighting fuel, age at pregnancy, pregnancy related factors, SLI, residence, house type, religion, caste etc., | 1.26 (1.12, 1.43) | 0.0, 0.39 |

\*p value for Cochrane Q statistics

**Supplementary table 1a.** Reasons for exclusion of studies from meta-analysis

| Author                | Study design    | Study location (rural/urban) | Age group (years)                 | Exposure cooking fuel | Comparison cooking fuel                   | Disease Definition                                            | Sample size                    | Odds ratio (95% CI)  | Reasons for exclusion                     |
|-----------------------|-----------------|------------------------------|-----------------------------------|-----------------------|-------------------------------------------|---------------------------------------------------------------|--------------------------------|----------------------|-------------------------------------------|
| <b>Cataract</b>       |                 |                              |                                   |                       |                                           |                                                               |                                |                      |                                           |
| Mishra VK et al. (12) | National survey | Urban, Rural                 | ≥30                               | Biomass               | Coal, kerosene, electricity, LPG, bio gas | Self -reported partial blindness/cataract, complete blindness | 173520                         | 1.12 (1.3 to 1.50)   | OR for blindness (partial or complete)    |
| Mohan M et al. (63)   | Case-control    | Urban, hospital based        | 37-62                             | Cow dung, wood        | LPG                                       | Physician determined                                          | Cases - 1441<br>Control - 549  | 0.62 (0.40 to 0.98)  | OR not available for women                |
| Saha A et al. (64)    | Cross sectional |                              |                                   | Wood                  | LPG                                       | Physician determined                                          | 469                            | 3.47 (1.05 to 11.50) | OR not available for women                |
| <b>TB</b>             |                 |                              |                                   |                       |                                           |                                                               |                                |                      |                                           |
| Kolappan C et al. (8) | Case-control    | Urban, Rural hospital based  | 15 to 60                          | Biomass               | Cleaner fuel                              | Chest radiograph, sputum smear or culture examination         | Cases - 255<br>Controls - 1275 | 1.7 (1.0 to 2.9)     | OR not available for women                |
| Shetty N et al. (65)  | Case-control    | Urban, hospital based        | 15-83                             | Biomass               | Gas, electricity                          | Sputum smear test and chest X-ray                             | 185 Cases and Controls         | 23 (3.1 to 170.3)    | Small sample size, wide age               |
| <b>COPD</b>           |                 |                              |                                   |                       |                                           |                                                               |                                |                      |                                           |
| Qureshi KA (66)       | Cross sectional | Rural                        | 15-50                             | Solid cooking fuel    | Different duration of exposure            | FVC, FEV1 tests                                               | 138                            | 2.10 (1.5 to 2.94)   | Use of solid fuel for heating and burning |
| Jain NK et al. (67)   | Not specified   | Urban                        | Mean age male 61.57, Female 58.34 | Biomass               | Non smokers                               | Spirometric evaluation, chest X-ray, CT scan                  | 702                            | Prevalence of COPD   | OR not included                           |

| Author                    | Study design    | Study location (rural/urban) | Age group (years)       | Exposure cooking fuel    | Comparison cooking fuel | Disease Definition                             | Sample size                                  | Odds ratio (95% CI)       | Reasons for exclusion                                          |
|---------------------------|-----------------|------------------------------|-------------------------|--------------------------|-------------------------|------------------------------------------------|----------------------------------------------|---------------------------|----------------------------------------------------------------|
| Dutt D et al. (68)        | Cross sectional | Urban slum                   | 15-60                   | Biofuels                 | Kerosene, LPG           | Pulmonary function test, respiratory morbidity | 315 (97 biomass, 100 kerosene, 98 LPG) women | 4.17 (0.46 to 38.02)      | Small sample size, wide age group                              |
| Jindal SK et al. (69)     | Cross-sectional | Rural and Urban              | ≥35                     | Solid fuel               | No cooking              | Questionnaire                                  | 35295                                        | 0.635 (0.524 to 0.771)    | OR not given for women exclusively, comparison with no cooking |
| Behera D et al. (70)      | Cross-sectional | Rural                        | Not specified           | Biomass                  | LPG, kerosene, mixed    | Questionnaire, spirometry                      | 3701                                         | Prevalence                | OR not included.                                               |
| Mahesh PA et al. (71)     | Cross-sectional | Rural                        | >30                     | Biomass fuel             | Non-smokers             | Questionnaire                                  | 3953                                         | Prevalence rate mentioned | OR not given                                                   |
| <b>Stillbirths</b>        |                 |                              |                         |                          |                         |                                                |                                              |                           |                                                                |
| Wylie BJ et al. (72)      | Cohort          | Urban, rural facility        | >15                     | Wood, cow dung, charcoal | Gas                     | Questionnaire                                  | 1744                                         | 4% vs 0%                  | Small sample size                                              |
| Tielsch JM et al. (15)    | Cohort          | Rural                        | Live births to 6 months | Wood, dung               | Biogas or kerosene      | Birth weight, Small for gestational age        | 11728 live births                            | SGA 1.21 (1.11 to 1.31)   | No OR for still birth                                          |
| Mavalankar DV et al. (62) | Case control    | Urban, hospital based        | 30-34                   | Cooking smoke            | Not specified           |                                                | 451 still births<br>1465 controls            | 1.5 (1.0 to 2.1)          | Not adjusted for second hand smoke                             |

**Supplementary table 1b.** Forest Plot for studies included in meta-analysis

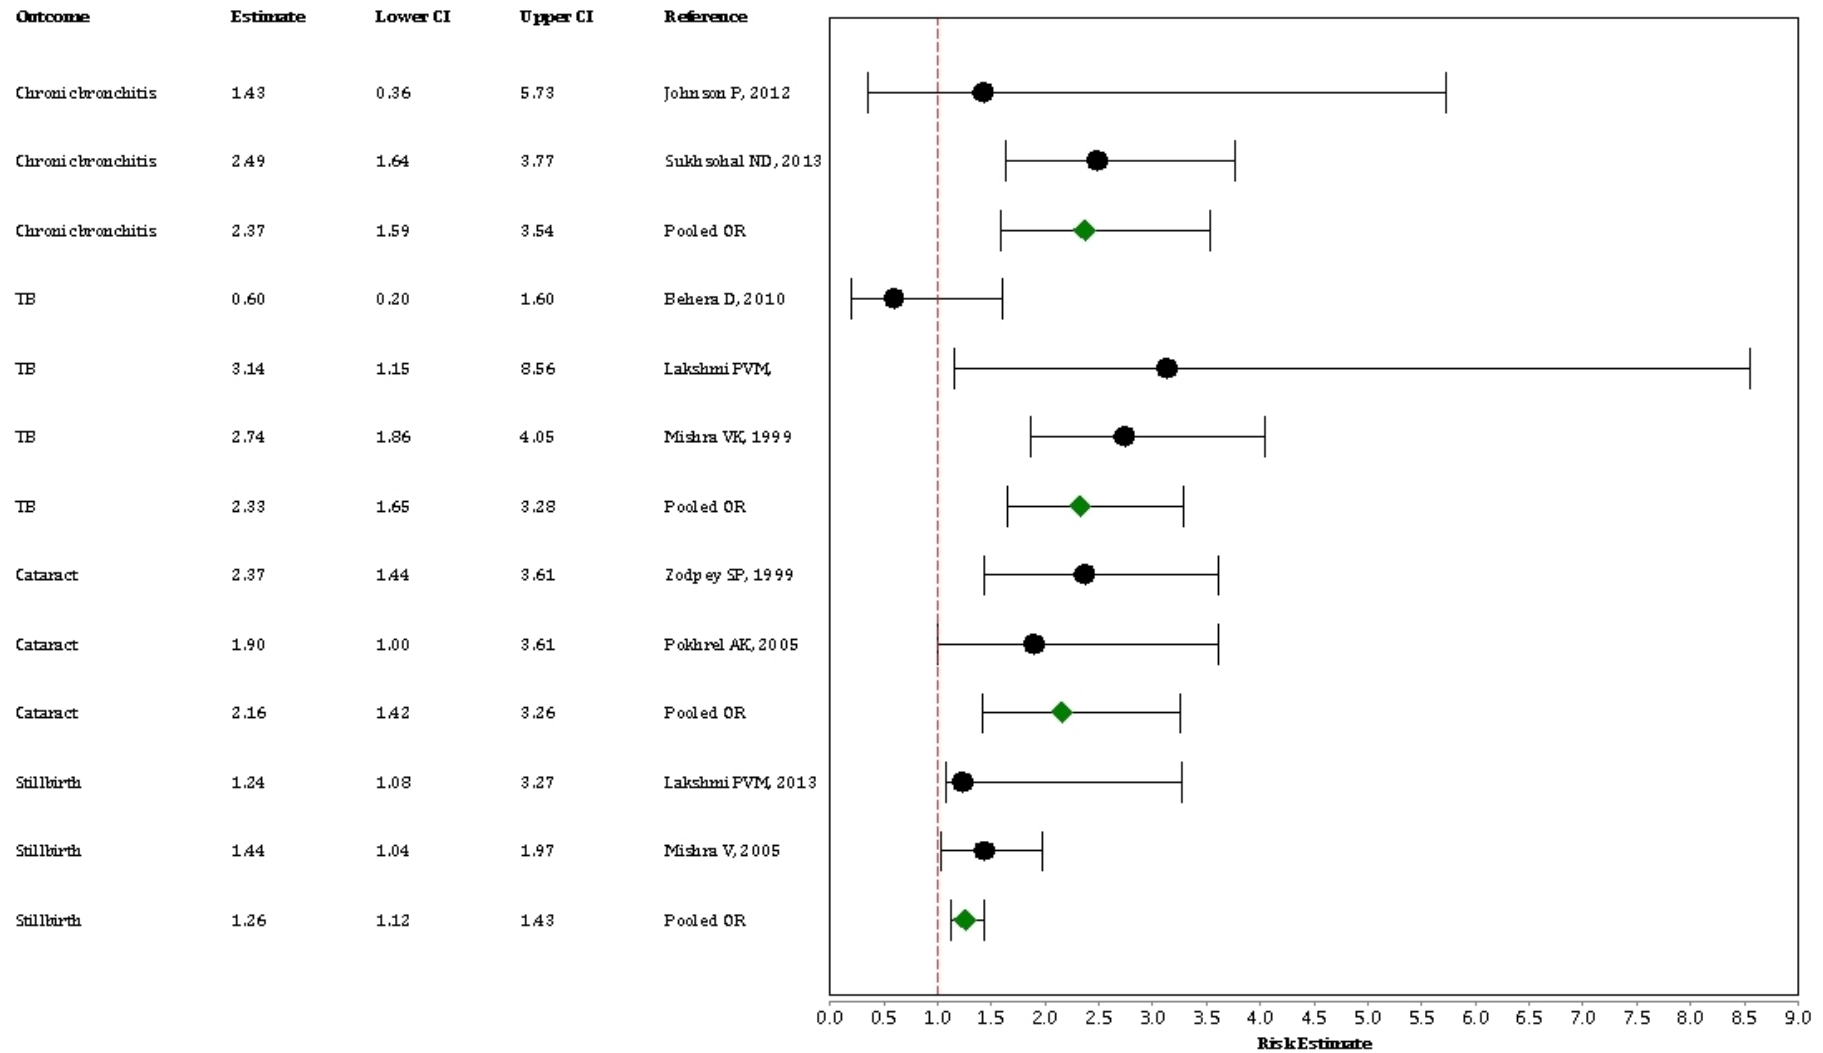

Supplement: GHA-7-25326-s002.pdf [file GHA-7-25326-s002.pdf]
