# Supplementary material for: Disease burden due to biomass cooking-fuel-related household air pollution among women in India
Source: PubMed Central journal article supplement (PMC4221659; doi:10.3402/gha.v7.25326), 2014-11-04

**Supplementary figure 1. Flow chart for systematic review of literature for selection of studies**

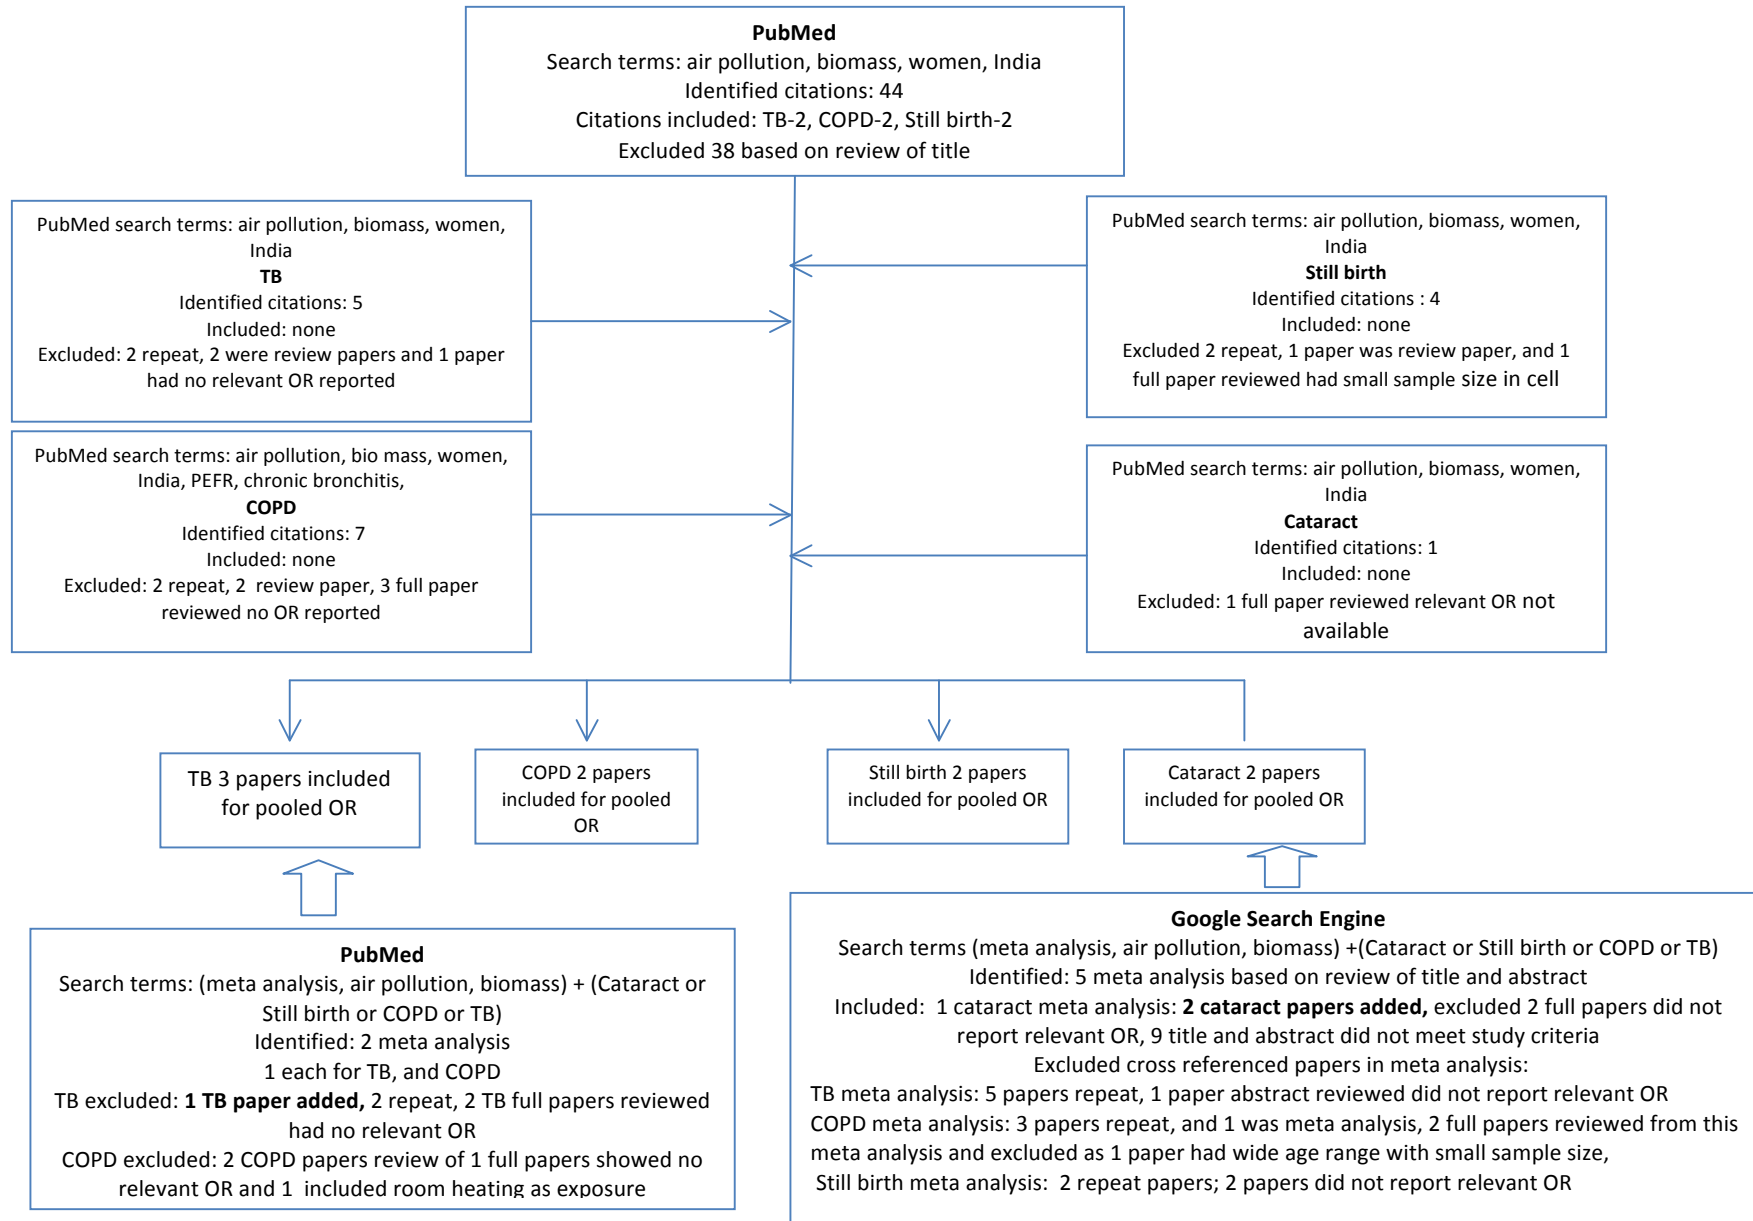

Supplement: GHA-7-25326-s001.pdf [file GHA-7-25326-s001.pdf]
