# Supplementary material for: Disease burden due to biomass cooking-fuel-related household air pollution among women in India
Source: PubMed Central journal article supplement (PMC4221659; doi:10.3402/gha.v7.25326), 2014-11-04
Supplement: GHA-7-25326-s003.pdf [file GHA-7-25326-s003.pdf]

**Supplementary table 2.** Estimates for chronic bronchitis

| <b>Urban</b>      |                                |                                                    |                                                              |      |         |         |             |         |         |                                                                               |                           |           |           |           |
|-------------------|--------------------------------|----------------------------------------------------|--------------------------------------------------------------|------|---------|---------|-------------|---------|---------|-------------------------------------------------------------------------------|---------------------------|-----------|-----------|-----------|
| age group (years) | total no. urban_females census | pe - proportion of biomass exposure in urban women | Population exposed - total no. of females exposed to Biomass | OR   |         |         | PAF (urban) |         |         | Rate (unexposed) - prevalence of chronic bronchitis (Jindal et al.. 2012 (3)) | total cases in population | AC        |           |           |
|                   |                                |                                                    |                                                              | Est  | lowerCI | UpperCI | Est         | lowerCI | UpperCI |                                                                               |                           | Est       | lowerCI   | UpperCI   |
| 35-44             | 26,161,110                     | 0.1880                                             | 4,918,289                                                    | 2.37 | 1.59    | 3.54    | 0.20        | 0.10    | 0.32    | 0.0133                                                                        | 347,698                   | 71,212    | 34,716    | 112,373   |
| 45-54             | 18,340,002                     | 0.1880                                             | 3,447,920                                                    | 2.37 | 1.59    | 3.54    | 0.20        | 0.10    | 0.32    | 0.0255                                                                        | 468,400                   | 95,933    | 46,767    | 151,382   |
| 55-64             | 11,967,363                     | 0.1880                                             | 2,249,864                                                    | 2.37 | 1.59    | 3.54    | 0.20        | 0.10    | 0.32    | 0.0343                                                                        | 410,982                   | 84,173    | 41,035    | 132,825   |
| 65-74             | 6,530,620                      | 0.1880                                             | 1,227,757                                                    | 2.37 | 1.59    | 3.54    | 0.20        | 0.10    | 0.32    | 0.0542                                                                        | 353,633                   | 72,427    | 35,309    | 114,291   |
| >=75              | 3,245,269                      | 0.1880                                             | 610,111                                                      | 2.37 | 1.59    | 3.54    | 0.20        | 0.10    | 0.32    | 0.0625                                                                        | 202,948                   | 41,566    | 20,263    | 65,591    |
|                   |                                |                                                    |                                                              |      |         |         |             |         |         | total                                                                         | 1,783,660                 | 365,310   | 178,090   | 576,462   |
| <b>Rural</b>      |                                |                                                    |                                                              |      |         |         |             |         |         |                                                                               |                           |           |           |           |
| 35-44             | 50,937,056                     | 0.8260                                             | 42,074,008                                                   | 2.37 | 1.59    | 3.54    | 0.53        | 0.33    | 0.68    | 0.0133                                                                        | 676,986                   | 359,394   | 221,820   | 458,465   |
| 45-54             | 35,054,663                     | 0.8260                                             | 28,955,152                                                   | 2.37 | 1.59    | 3.54    | 0.53        | 0.33    | 0.68    | 0.0255                                                                        | 895,288                   | 475,285   | 293,349   | 606,303   |
| 55-64             | 26,678,850                     | 0.8260                                             | 22,036,730                                                   | 2.37 | 1.59    | 3.54    | 0.53        | 0.33    | 0.68    | 0.0343                                                                        | 916,202                   | 486,387   | 300,202   | 620,466   |
| 65-74             | 16,535,168                     | 0.8260                                             | 13,658,049                                                   | 2.37 | 1.59    | 3.54    | 0.53        | 0.33    | 0.68    | 0.0542                                                                        | 895,380                   | 475,333   | 293,379   | 606,365   |
| >=75              | 7,184,673                      | 0.8260                                             | 5,934,540                                                    | 2.37 | 1.59    | 3.54    | 0.53        | 0.33    | 0.68    | 0.0625                                                                        | 449,305                   | 238,524   | 147,219   | 304,276   |
|                   |                                |                                                    |                                                              |      |         |         |             |         |         | total                                                                         | 3,833,161                 | 2,034,922 | 1,255,969 | 2,595,875 |
|                   |                                |                                                    |                                                              |      |         |         |             |         |         | grand total                                                                   | 5,616,821                 | 2,400,233 | 1,434,059 | 3,172,337 |
