# Supplementary material for: Disease burden due to biomass cooking-fuel-related household air pollution among women in India
Source: PubMed Central journal article supplement (PMC4221659; doi:10.3402/gha.v7.25326), 2014-11-04
Supplement: GHA-7-25326-s004.pdf [file GHA-7-25326-s004.pdf]

**Supplementary table 3a.** Estimates for TB (Urban)

| age group (years) | total no. urban_females census | pe - proportion of biomass exposure in urban women | Population exposed - total no. urban females exposed to Biomass | OR   |         |         | PAF (urban) |         |         | Rate (unexposed) - prevalence of chronic bronchitis (Jindal et al.. 2012 (3)) | total cases in population | AC      |         |         |
|-------------------|--------------------------------|----------------------------------------------------|-----------------------------------------------------------------|------|---------|---------|-------------|---------|---------|-------------------------------------------------------------------------------|---------------------------|---------|---------|---------|
|                   |                                |                                                    |                                                                 | Est  | lowerCI | UpperCI | Est         | lowerCI | UpperCI |                                                                               |                           | Est     | lowerCI | UpperCI |
| 35-44             | 26,161,110                     | 0.1880                                             | 4,918,289                                                       | 2.37 | 1.59    | 3.54    | 0.20        | 0.10    | 0.32    | 0.0133                                                                        | 347,698                   | 71,212  | 34,716  | 112,373 |
| 45-54             | 18,340,002                     | 0.1880                                             | 3,447,920                                                       | 2.37 | 1.59    | 3.54    | 0.20        | 0.10    | 0.32    | 0.0255                                                                        | 468,400                   | 95,933  | 46,767  | 151,382 |
| 55-64             | 11,967,363                     | 0.1880                                             | 2,249,864                                                       | 2.37 | 1.59    | 3.54    | 0.20        | 0.10    | 0.32    | 0.0343                                                                        | 410,982                   | 84,173  | 41,035  | 132,825 |
| 65-74             | 6,530,620                      | 0.1880                                             | 1,227,757                                                       | 2.37 | 1.59    | 3.54    | 0.20        | 0.10    | 0.32    | 0.0542                                                                        | 353,633                   | 72,427  | 35,309  | 114,291 |
| >=75              | 3,245,269                      | 0.1880                                             | 610,111                                                         | 2.37 | 1.59    | 3.54    | 0.20        | 0.10    | 0.32    | 0.0625                                                                        | 202,948                   | 41,566  | 20,263  | 65,591  |
|                   |                                |                                                    |                                                                 |      |         |         |             |         |         | total                                                                         | 1,783,660                 | 365,310 | 178,090 | 576,462 |

**Supplementary table 3b.** Estimates for TB (Rural)

| age group (years) | total no. rural_female census | pe - proportion of biomass exposure in rural women | Population exposed - total no. rural females exp to Biomass | OR   |         |         | PAF (rural) |         |         | Rate (unexposed) - prevalence of TB (annual report (22)) | total cases in population | AC      |         |         |
|-------------------|-------------------------------|----------------------------------------------------|-------------------------------------------------------------|------|---------|---------|-------------|---------|---------|----------------------------------------------------------|---------------------------|---------|---------|---------|
|                   |                               |                                                    |                                                             | Est  | lowerCI | UpperCI | Est         | lowerCI | UpperCI |                                                          |                           | Est     | lowerCI | UpperCI |
| 25-34             | 61,647,268                    | 0.8260                                             | 50,920,643                                                  | 2.33 | 1.65    | 3.28    | 0.52        | 0.35    | 0.65    | 0.00256                                                  | 157,817                   | 82,615  | 55,132  | 103,082 |
| 35-44             | 50,937,056                    | 0.8260                                             | 42,074,008                                                  | 2.33 | 1.65    | 3.28    | 0.52        | 0.35    | 0.65    | 0.00256                                                  | 130,399                   | 68,262  | 45,553  | 85,173  |
| 45-54             | 35,054,663                    | 0.8260                                             | 28,955,152                                                  | 2.33 | 1.65    | 3.28    | 0.52        | 0.35    | 0.65    | 0.00256                                                  | 89,740                    | 46,978  | 31,350  | 58,616  |
| 55-64             | 26,678,850                    | 0.8260                                             | 22,036,730                                                  | 2.33 | 1.65    | 3.28    | 0.52        | 0.35    | 0.65    | 0.00256                                                  | 68,298                    | 35,753  | 23,859  | 44,610  |
| 65-74             | 16,535,168                    | 0.8260                                             | 13,658,049                                                  | 2.33 | 1.65    | 3.28    | 0.52        | 0.35    | 0.65    | 0.00256                                                  | 42,330                    | 22,159  | 14,788  | 27,649  |
| >=75              | 7,184,673                     | 0.8260                                             | 5,934,540                                                   | 2.33 | 1.65    | 3.28    | 0.52        | 0.35    | 0.65    | 0.00256                                                  | 18,393                    | 9,628   | 6,425   | 12,014  |
|                   |                               |                                                    |                                                             |      |         |         |             |         |         | total                                                    | 506,976                   | 265,396 | 177,107 | 331,143 |
|                   |                               |                                                    |                                                             |      |         |         |             |         |         | grand total                                              | 759,337                   | 315,874 | 204,587 | 406,860 |
