# Supplementary material for: Disease burden due to biomass cooking-fuel-related household air pollution among women in India
Source: PubMed Central journal article supplement (PMC4221659; doi:10.3402/gha.v7.25326), 2014-11-04
Supplement: GHA-7-25326-s005.pdf [file GHA-7-25326-s005.pdf]

**Supplementary table 4a.** Estimates for cataract

| age group (years) | total no. urban_females census | pe - proportion of biomass exposure in urban women | Population exposed - total no. urban females exposed to Biomass | OR   |         |         | PAF (urban) |         |         | Rate (unexposed) - prevalence cataract (Murthy et al. (23)) | total cases in population | AC        |           |           |
|-------------------|--------------------------------|----------------------------------------------------|-----------------------------------------------------------------|------|---------|---------|-------------|---------|---------|-------------------------------------------------------------|---------------------------|-----------|-----------|-----------|
|                   |                                |                                                    |                                                                 | Est  | lowerCI | UpperCI | Est         | lowerCI | UpperCI |                                                             |                           | Est       | lowerCI   | UpperCI   |
| 50-59             | 14,348,805                     | 0.1880                                             | 2,697,575                                                       | 2.16 | 1.42    | 3.26    | 0.18        | 0.07    | 0.30    | 0.545                                                       | 7,820,099                 | 1,400,078 | 572,287   | 2,331,848 |
| 60-69             | 9,405,003                      | 0.1880                                             | 1,768,141                                                       | 2.16 | 1.42    | 3.26    | 0.18        | 0.07    | 0.30    | 0.863                                                       | 8,116,518                 | 1,453,148 | 593,980   | 2,420,236 |
|                   |                                |                                                    |                                                                 |      |         |         |             |         |         | total                                                       | 15,936,616                | 2,853,226 | 1,166,267 | 4,752,084 |

**Supplementary table 4b** Cataract based on OR

| age group (years) | total no. rural_female census | pe - proportion of biomass exposure in rural women | Population exposed - total no. rural females exposed to Biomass | OR   |         |         | PAF (rural) |         |         | Rate (unexposed) - prevalence cataract (Murthy et al. 2007 (23)) | total cases in population | AC         |            |            |
|-------------------|-------------------------------|----------------------------------------------------|-----------------------------------------------------------------|------|---------|---------|-------------|---------|---------|------------------------------------------------------------------|---------------------------|------------|------------|------------|
|                   |                               |                                                    |                                                                 | Est  | lowerCI | UpperCI | Est         | lowerCI | UpperCI |                                                                  |                           | Est        | lowerCI    | UpperCI    |
| 50-59             | 28,567,226                    | 0.8260                                             | 14,477,576                                                      | 2.16 | 1.42    | 3.26    | 0.49        | 0.26    | 0.65    | 0.545                                                            | 15,569,138                | 7,618,236  | 4,010,071  | 10,138,220 |
| 60-69             | 23,067,612                    | 0.8260                                             | 22,036,730                                                      | 2.16 | 1.42    | 3.26    | 0.49        | 0.26    | 0.65    | 0.863                                                            | 19,907,349                | 9,740,994  | 5,127,445  | 12,963,151 |
|                   |                               |                                                    |                                                                 |      |         |         |             |         |         | total                                                            | 35,476,487                | 17,359,231 | 9,137,516  | 23,101,371 |
|                   |                               |                                                    |                                                                 |      |         |         |             |         |         | grand total                                                      | 51,413,104                | 20,212,456 | 10,303,783 | 27,853,455 |

**Supplementary table 4c**

| age group (years) | total no. urban_females census | pe - proportion of biomass exposure in urban women | Population exposed - total no. urban females exposed to Biomass | RR   |         |         | PAF (urban) |         |         | Rate (unexposed) - prevalence cataract (Murthy et al.. 2007 (23)) | total cases in population | AC      |         |         |
|-------------------|--------------------------------|----------------------------------------------------|-----------------------------------------------------------------|------|---------|---------|-------------|---------|---------|-------------------------------------------------------------------|---------------------------|---------|---------|---------|
|                   |                                |                                                    |                                                                 | Est  | lowerCI | UpperCI | Est         | lowerCI | UpperCI |                                                                   |                           | Est     | lowerCI | UpperCI |
| 50-59             | 14,348,805                     | 0.1880                                             | 1,723,960                                                       | 1.32 | 1.16    | 1.46    | 0.06        | 0.03    | 0.08    | 0.545                                                             | 7,820,099                 | 448,162 | 226,287 | 624,546 |
| 60-69             | 9,405,003                      | 0.1880                                             | 2,249,864                                                       | 1.08 | 1.04    | 1.11    | 0.015       | 0.008   | 0.019   | 0.863                                                             | 8,116,518                 | 119,400 | 65,036  | 157,264 |
|                   |                                |                                                    |                                                                 |      |         |         |             |         |         | total                                                             | 15,936,616                | 567,563 | 291,323 | 781,810 |

**Supplementary table 4d Cataract based on RR**

| age group (years) | total no. rural_female census | pe - proportion of biomass exposure in rural women | Population exposed - total no. rural females exposed to Biomass | RR*  |         |         | PAF (rural) |         |         | Rate (unexposed) - prevalence cataract (Murthy et al.. 2007 (23)) | total cases in population | AC        |           |           |
|-------------------|-------------------------------|----------------------------------------------------|-----------------------------------------------------------------|------|---------|---------|-------------|---------|---------|-------------------------------------------------------------------|---------------------------|-----------|-----------|-----------|
|                   |                               |                                                    |                                                                 | Est  | lowerCI | UpperCI | Est         | lowerCI | UpperCI |                                                                   |                           | Est       | Lower CI  | Upper CI  |
| 50-59             | 28,567,226                    | 0.8260                                             | 14,477,576                                                      | 1.32 | 1.16    | 1.46    | 0.21        | 0.12    | 0.28    | 0.545                                                             | 15,569,138                | 3,281,930 | 1,802,405 | 4,298,169 |
| 60-69             | 23,067,612                    | 0.8260                                             | 22,036,730                                                      | 1.08 | 1.04    | 1.11    | 0.06        | 0.03    | 0.08    | 0.863                                                             | 19,907,349                | 1,225,502 | 682,293   | 1,590,153 |
|                   |                               |                                                    |                                                                 |      |         |         |             |         |         | total                                                             | 35,476,487                | 4,507,432 | 2,484,698 | 5,888,322 |
|                   |                               |                                                    |                                                                 |      |         |         |             |         |         | grand total                                                       | 51,413,104                | 5,074,994 | 2,776,021 | 6,670,132 |

\*Please note that RR are different for the age strata as prevalence of disease is different for each age group, PAF will also be different across strata

**Supplementary table 4e** Cataract based on estimated RR

|           |                                                                                                    |          |          |
|-----------|----------------------------------------------------------------------------------------------------|----------|----------|
| Age group | Cataract ESTIMATED RR = (OR)/ (1-Pe)+(Pe X OR); where Pe is the prevalence of disease in unexposed |          |          |
|           | RR                                                                                                 |          |          |
|           | Est                                                                                                | Lower CI | Upper CI |
| 50-59     | 1.32                                                                                               | 1.16     | 1.46     |
| 60-69     | 1.08                                                                                               | 1.04     | 1.10     |
|           | Please note that OR and RR are different for the age strata                                        |          |          |
