# Supplementary material for: Disease burden due to biomass cooking-fuel-related household air pollution among women in India
Source: PubMed Central journal article supplement (PMC4221659; doi:10.3402/gha.v7.25326), 2014-11-04
Supplement: GHA-7-25326-s006.pdf [file GHA-7-25326-s006.pdf]

**Supplementary table 5a.** Estimates for stillbirth

|                               |                               |                                  |                            |                                  |                                                    |                                               | OR   |          |          |      | PAF (urban) |          |       | AC       |          |  |
|-------------------------------|-------------------------------|----------------------------------|----------------------------|----------------------------------|----------------------------------------------------|-----------------------------------------------|------|----------|----------|------|-------------|----------|-------|----------|----------|--|
| total urban population census | birth rate/population (urban) | still birth rate/live birth (20) | total births in population | total still births in population | pe - proportion of biomass exposure in urban women | total no. urban population exposed to Biomass | Est  | Lower CI | Upper CI | Est  | Lower CI    | Upper CI | Est   | Lower CI | Upper CI |  |
| 375,331,461                   | 0.0176                        | 0.006                            | 6,605,834                  | 39,635                           | 0.1880                                             | 70,562,315                                    | 1.26 | 1.12     | 1.43     | 0.05 | 0.02        | 0.07     | 1,847 | 874      | 2,964    |  |

**Supplementary table 5b**

|                               |                               |                                    |                                  |                            |                                  |                                          |                                                    |                                               | OR   |          |          |      | PAF (rural) |          |        | AC       |          |  |
|-------------------------------|-------------------------------|------------------------------------|----------------------------------|----------------------------|----------------------------------|------------------------------------------|----------------------------------------------------|-----------------------------------------------|------|----------|----------|------|-------------|----------|--------|----------|----------|--|
| total rural population census | birth rate/population (rural) | total no. of births in exp (rural) | still birth rate/live birth (20) | total births in population | total still births in population | total no. of still births in exp (rural) | pe - proportion of biomass exposure in rural women | total no. rural population exposed to Biomass | Est  | Lower CI | Upper CI | Est  | Lower CI    | Upper CI | Est    | Lower CI | Upper CI |  |
| 830,143,635                   | 0.023                         | 15,839,639                         | 0.006                            | 19,342,347                 | 116,054                          | 110,877                                  | 0.8260                                             | 685,698,643                                   | 1.26 | 1.12     | 1.43     | 0.18 | 0.09        | 0.26     | 20,517 | 10,466   | 30,417   |  |
|                               |                               |                                    | grand total                      | 25,948,180                 | 155,689                          | 119,472                                  |                                                    |                                               |      |          |          |      |             |          | 22,365 | 11,340   | 33,381   |  |

**Supplementary table 5c**

|                               |                               |                                    |                                                          |                            |                                  |                                          |                                                    |                                               | OR   |          |          | PAF (urban) |          |          | AC    |          |          |
|-------------------------------|-------------------------------|------------------------------------|----------------------------------------------------------|----------------------------|----------------------------------|------------------------------------------|----------------------------------------------------|-----------------------------------------------|------|----------|----------|-------------|----------|----------|-------|----------|----------|
| total urban population census | birth rate/population (urban) | total no. of births in exp (urban) | still birth rate/live birth (Cousens S et al. 2011 (26)) | total births in population | total still births in population | total no. of still births in exp (urban) | pe - proportion of biomass exposure in urban women | total no. urban population exposed to Biomass | Est  | Lower CI | Upper CI | Est         | Lower CI | Upper CI | Est   | lower CI | Upper CI |
| 375,331,461                   | 0.018                         | 1,227,784                          | 0.022                                                    | 6,605,834                  | 145,328                          | 27,011                                   | 0.1880                                             | 70,562,315                                    | 1.26 | 1.12     | 1.43     | 0.05        | 0.02     | 0.07     | 6,773 | 3,206    | 10,870   |

**Supplementary table 5d**

|                               |                               |                                    |                                                           |                            |                                  |                                          |                                                    |                                               | OR   |          |          | PAF (rural) |          |             | AC     |          |          |
|-------------------------------|-------------------------------|------------------------------------|-----------------------------------------------------------|----------------------------|----------------------------------|------------------------------------------|----------------------------------------------------|-----------------------------------------------|------|----------|----------|-------------|----------|-------------|--------|----------|----------|
| total rural population census | birth rate/population (rural) | total no. of births in exp (rural) | still birth rate/live birth (Cousens S et al.. 2011 (26)) | total births in population | total still births in population | total no. of still births in exp (rural) | pe - proportion of biomass exposure in rural women | total no. rural population exposed to Biomass | Est  | Lower CI | Upper CI | Est         | Lower CI | Upper CI    | Est    | Lower CI | Upper CI |
| 830,143,635                   | 0.023                         | 15,839,639                         | 0.022                                                     | 19,342,347                 | 425,532                          | 348,472                                  | 0.8260                                             | 685,698,643                                   | 1.26 | 1.12     | 1.43     | 0.18        | 0.09     | 0.26        | 75,231 | 38,375   | 111,528  |
|                               |                               |                                    | grand total                                               | 25,948,180                 | 570,860                          | 375,483                                  |                                                    |                                               |      |          |          |             |          | grand total | 82,003 | 41,581   | 122,397  |
